# Supplementary material for: Synthesis, characterization and application of γ-MnO2/graphene oxide for the selective aerobic oxidation of benzyl alcohols to corresponding carbonyl compounds
Source: Royal Society of Chemistry journal article supplement (doi:10.1039/c5nj03140k), 2015-12-01
Supplement: c5nj03140k1.pdf [file c5nj03140k1.pdf]

**Supporting Information: Synthesis, Characterization and Application of  $\gamma$ -  
 $\text{MnO}_2$ /Graphene Oxide for Selective Aerobic Oxidation of Benzyl Alcohols to  
Corresponding Carbonyl Compounds**

<sup>1</sup> Department of Chemical Engineering, Institute of Chemical Technology, Nathalal Parekh Marg, Matunga, Mumbai Maharashtra, 400019, India.

<sup>2</sup> Department of Physics, Institute of Chemical Technology, Nathalal Parekh Marg, Mumbai, Maharashtra, 400 019, India.

<sup>3</sup> Department of Oils, Oleochemicals and Surfactant Technology, Institute of Chemical Technology, Nathalal Parekh Marg, Mumbai, Maharashtra, 400 019, India.

**\* Corresponding Author**

Tel.: + 91- 22 3361 2027;

Fax: +91- 22 3361 1020.

E-mail address: pr.nemade@ictmumbai.edu.in.

## Table of Contents

| <b>Sr. No.</b> | <b>Contents</b>                                                              | <b>Page No.</b> |
|----------------|------------------------------------------------------------------------------|-----------------|
| S1             | General information                                                          | 3               |
| S2             | Spectral data for selected compounds                                         | 3               |
| S3             | Copies of $^1\text{H}$ $^{13}\text{C}$ NMR, MS spectra of selected compounds | 5               |
| S4             | References                                                                   | 23              |

## S1. General information

All reagents were purchased from commercial sources and used as received. Natural graphite flakes (325 mesh, Alfa Aesar), potassium carbonate (S D Fine Chem. Ltd., Mumbai), sulphuric acid (99%, Merck), nitric acid (99%, Merck), hydrogen peroxide (30%, S D Fine Chem. Ltd., Mumbai), potassium carbonate (99% Sigma Aldrich), toluene (99%, Merck), benzyl alcohols (Sigma Aldrich) and used without any further purification. The progress of reaction was monitored by gas chromatography Perkin Elmer Clarus 400 GC equipped with flame ionization detector with a capillary column (Elite-1, 30 m x 0.32 mm x 0.25  $\mu$ m). Representative products were purified by column chromatography on silica gel (100-200) mesh. All the products are well known compounds and also confirmed by  $^1\text{H}$  NMR,  $^{13}\text{C}$  NMR, and GC-MS. The chemical shifts are reported in parts per million ( $\delta$ ) relative to tetramethylsilane as an internal standard. Mass spectra were obtained on Shimadzu GCMS-QP 2010 instrument (Rtx-17, 30 m  $\times$  25mmID, film thickness 0.25  $\mu$ m) (column flow- 2 mL/min, 80  $^\circ\text{C}$  to 240  $^\circ\text{C}$  at 10 $^\circ$ /min. rise.).

## S2. Spectral data for selected compounds

**Compound 1a:** MF =  $\text{C}_6\text{H}_4\text{CHOBr}$  Yellow liquid; IR (KBr) :  $\nu_{\text{max}}$  2816 (-CH), 2779 (-CH), 1711 (C=O), 528 (C-Br);  $^1\text{H}$  NMR(200MHz,  $\text{CDCl}_3$ , TMS):  $\delta$  =  $\delta$  7.33-7.41 (t, 1H), 7.73-7.78 (m, 1H), 8.25-8.26 (m, 1H), 10.0 (s, 1H);  $^{13}\text{C}$  NMR(50MHz,  $\text{CDCl}_3$ , TMS):  $\delta$  =  $\delta$   $^{13}\text{C}$  NMR (50 MHz,  $\text{CDCl}_3$ )  $\delta$  122.59 (C), 128.36 (CH), 128.76 (CH), 130.07 (CH), 133.20 (CH), 136.81 (C), 170.77 (CH).

GC-MS (EI) m/z (%) = 185(64)  $[\text{M}]^+$ , 155, 75, 65, 50. 78.

**Compound 2b:** MF = C<sub>6</sub>H<sub>4</sub>NO<sub>2</sub>CHO Yellow solid; IR (KBr):  $\nu_{\max}$  2733 (-CH), 2866 (-CH), 1702 (-C=O); <sup>1</sup>H NMR (200MHz,CDCl<sub>3</sub>,TMS):  $\delta$  =  $\delta$  7.73-7.81 (t, 1H), 8.22-8.25 (d, 1H), 8.47-8.51 (d, 1H), 8.71 (s, 1H), 10.12 (s, 1H); <sup>13</sup>C NMR(50MHz,CDCl<sub>3</sub>,TMS):  $\delta$  =  $\delta$  114.56 (CH), 131.43 (CH), 131.62 (CH), 131.78 (C), 168.38 (C), 189.83 (CH). [1]

GC-MS (EI) m/z (%) = 124(100) [M]<sup>+</sup>, 95, 75, 50.

**Compound 3c:** MF = C<sub>6</sub>H<sub>4</sub>CHO F White solid; IR (KBr):  $\nu_{\max}$  2860 (-CH), 2764 (-CH), 1786 (-C=O) 1040 (C-F); <sup>1</sup>H NMR (200MHz,CDCl<sub>3</sub>,TMS):  $\delta$  =  $\delta$  7.12-7.17 (m,1H), 7.23-7.29 (m, 1H), 7.89-7.95 (m,1H), 8.07-8.14 (m,1H), 9.97 (s, 1H); <sup>13</sup>C NMR(50MHz,CDCl<sub>3</sub>,TMS):  $\delta$  = 115.87 (CH), 131.43 (CH), 131.62 (CH), 132.75 (C), 189.83 (CH). [1]

GC-MS (EI) m/z (%) = 124(100) [M]<sup>+</sup>, 95, 75, 50.

**Compound 4d:** MF = C<sub>6</sub>H<sub>4</sub>CHOCl colourless liquid; IR (KBr):  $\nu_{\max}$  2831 (-CH), 2866 (-CH), 1694 (-C=O), 610 (-C-Cl); <sup>1</sup>H NMR (200MHz,CDCl<sub>3</sub>,TMS):  $\delta$  =  $\delta$  7.38-7.52 (m, 1H), 7.56-7.63 (m, 1H), 7.74-7.86 (m, 1H), 7.98-8.02 (d, 1H), 10.06 (s, 1H); <sup>13</sup>C NMR (50MHz,CDCl<sub>3</sub>,TMS):  $\delta$  = 124.51 (CH), 128.63 (CH), 130.43 (CH), 134.69 (C), 189.79 (CH).

MS (ESI): m/z [M] = 136.13

**Compound 6f:** MF = C<sub>8</sub>H<sub>8</sub>O<sub>2</sub> Light Brown liquid; IR (KBr):  $\nu_{\max}$  2970 (-CH), 2863 (-CH), 2761 (-CH) 1689 (-C=O); <sup>1</sup>H NMR (200MHz,CDCl<sub>3</sub>,TMS):  $\delta$  =  $\delta$  3.80 (s, 3H), 6.91-6.98 (d, 2H), 7.44-7.77 (d, 2H), 9.80 (s, 1H); <sup>13</sup>C NMR (50MHz,CDCl<sub>3</sub>,TMS):  $\delta$  = 55.6 (-CH<sub>3</sub>), 114.3 (CH), 129.9 (-C), 132.0 (CH), 164.6 (-C), 190.9 (CH).

GC-MS (EI) m/z (%) = 135(100) [M]<sup>+</sup>, 107, 92, 77, 63.

**Compound 7g:** MF = C<sub>7</sub>H<sub>6</sub>O<sub>2</sub> Yellowish Solid; IR (KBr):  $\nu_{\max}$  2869 (-CH), 1676 (C=O); <sup>1</sup>H NMR(200MHz,CDCl<sub>3</sub>,TMS):  $\delta$  =  $\delta$  6.96-6.98 (d, 2H), 7.80-7.83 (d, 2H), 9.83 (s, 1H); <sup>13</sup>C NMR(50MHz,CDCl<sub>3</sub>,TMS):  $\delta$  116.21 (CH), 129.73 (-C), 132.68 (CH), 161.92 (-C), 191.5 (CH).  
GC-MS (EI) m/z (%) = 122(100) [M]<sup>+</sup>, 93, 65.

**Compound 8h:** MF = C<sub>7</sub>H<sub>6</sub>O<sub>2</sub> Colourless liquid; IR (KBr):  $\nu_{\max}$  2845 (-CH), 1660 (-C=O); <sup>1</sup>H NMR(200MHz,CDCl<sub>3</sub>,TMS):  $\delta$  =  $\delta$  6.91-6.98 (m, 2H), 7.44-7.50 (m, 2H), 9.81 (s, 1H), 10.99 (s, 1H); <sup>13</sup>C NMR(50MHz,CDCl<sub>3</sub>,TMS):  $\delta$  =  $\delta$  117.6 (CH), 119.9 (CH), 120.1 (-C), 133.8 (CH), 137.0 (CH), 161.6 (-C), 196.7 (CH).

GC-MS (EI) m/z (%) = 122(100) [M]<sup>+</sup>, 93, 65.

### S3. Copies of $^1\text{H}$ $^{13}\text{C}$ NMR, MS spectra of selected products

#### 1a. 3-Bromobenzaldehyde

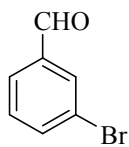

Mol. Wt.: 185.02

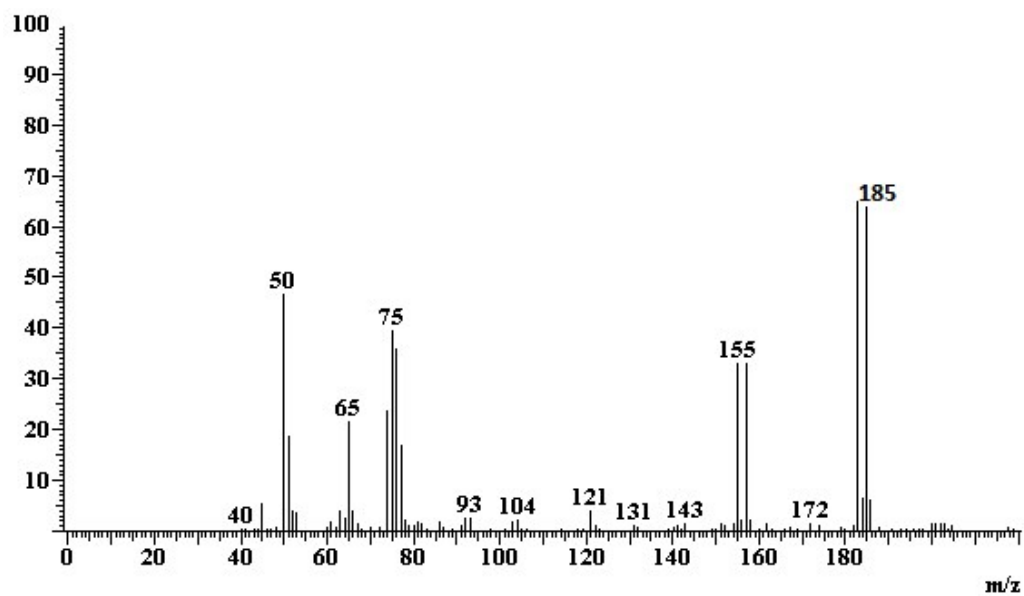

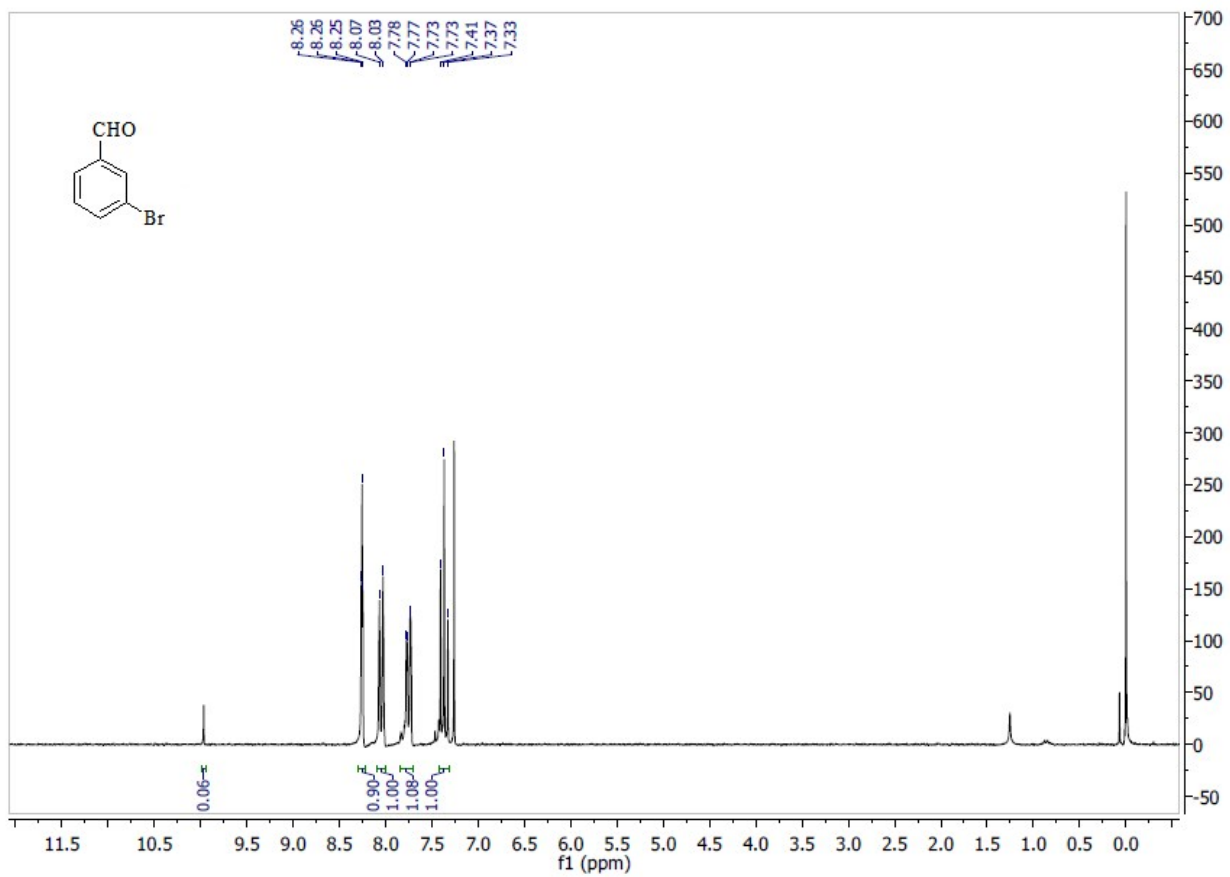

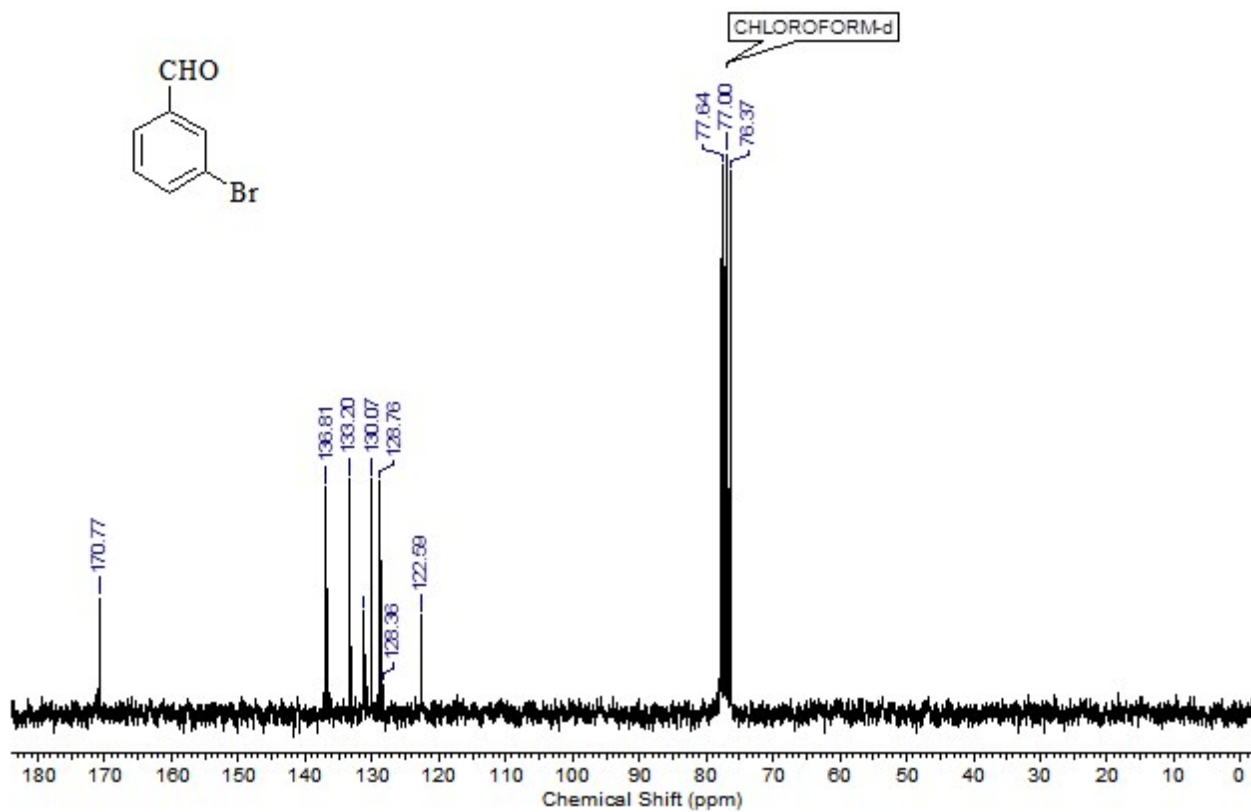



**2b. 3-Nitrobenzaldehyde**

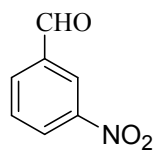

Mol. Wt.: 151.12

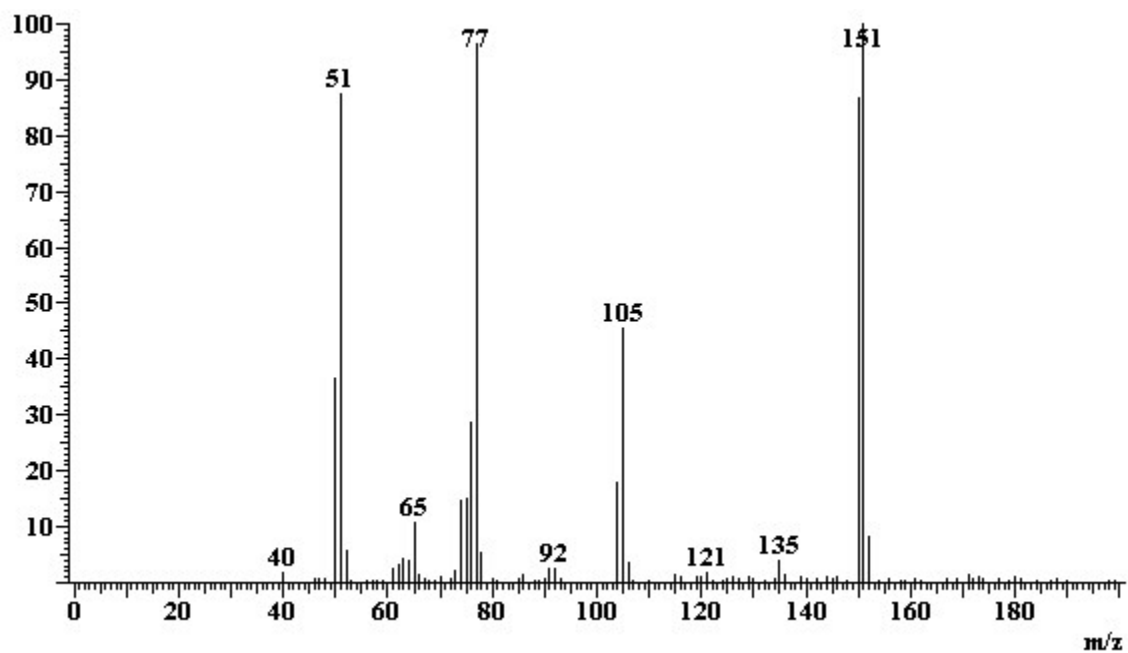

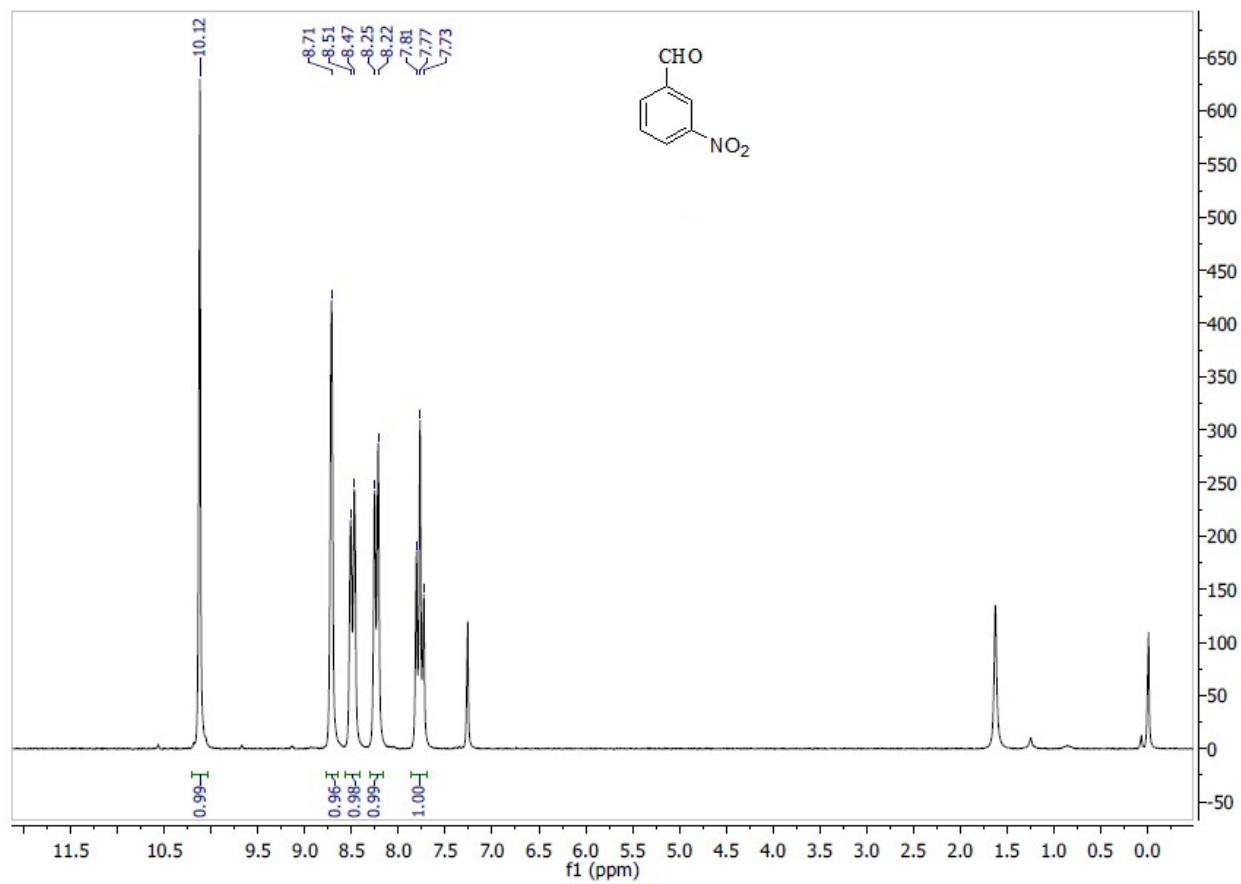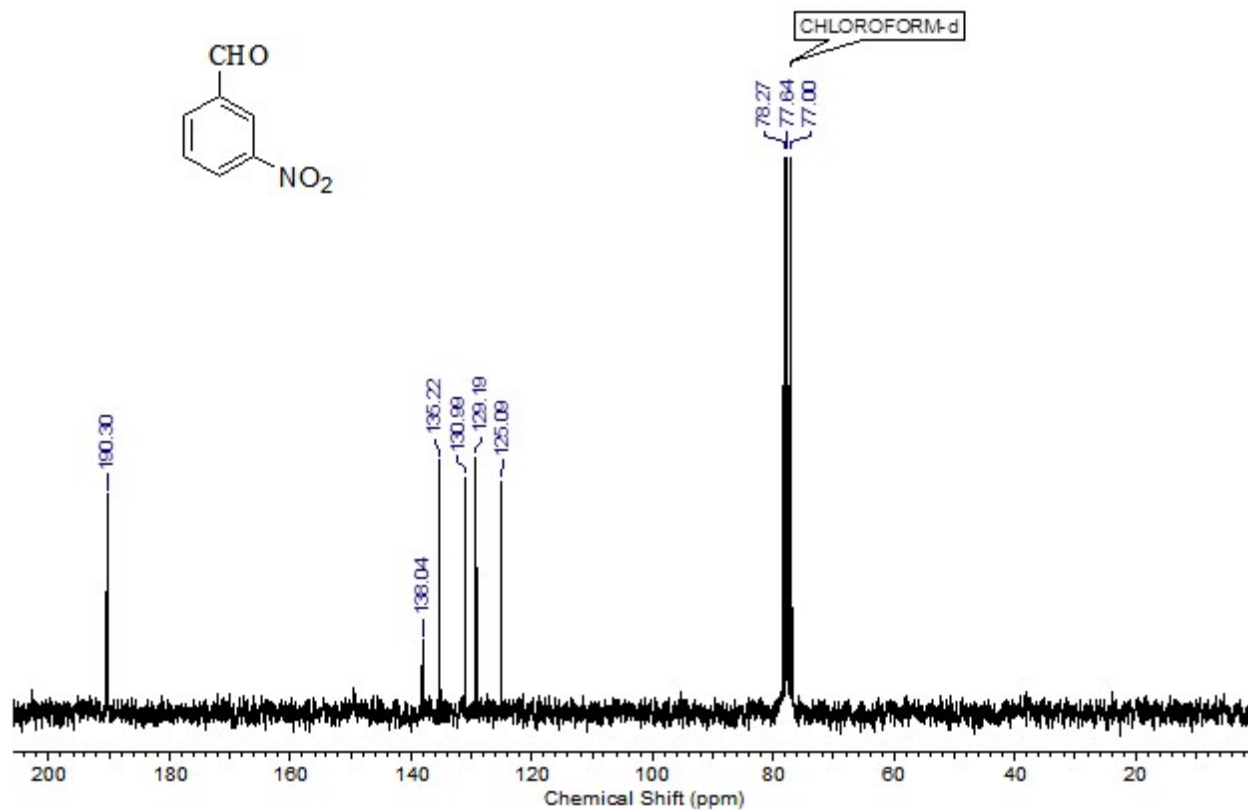



3c. 4-Florobenzaldehyde

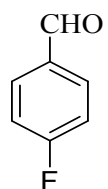

Mol. Wt.: 124.11

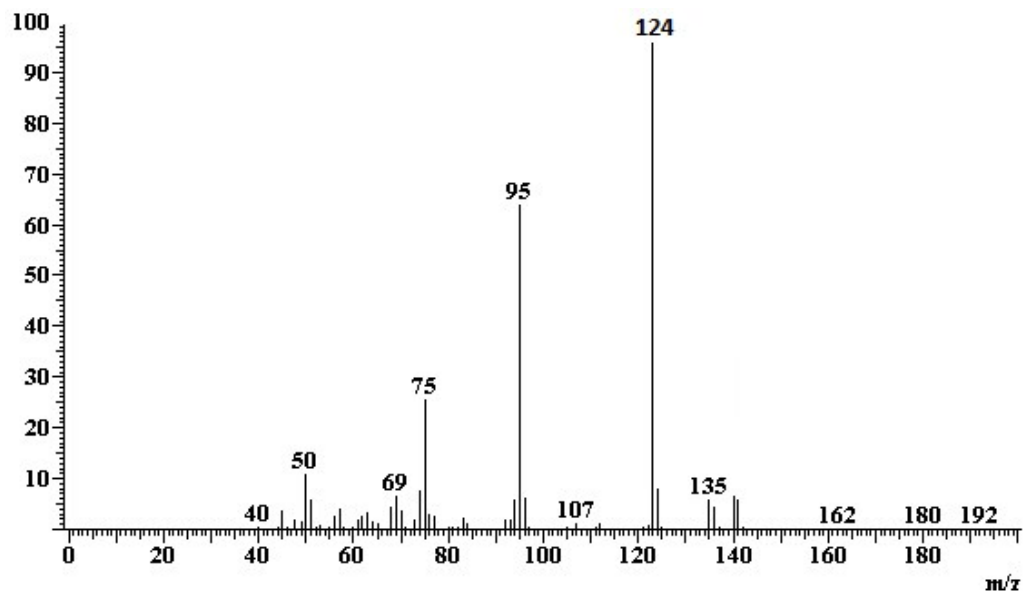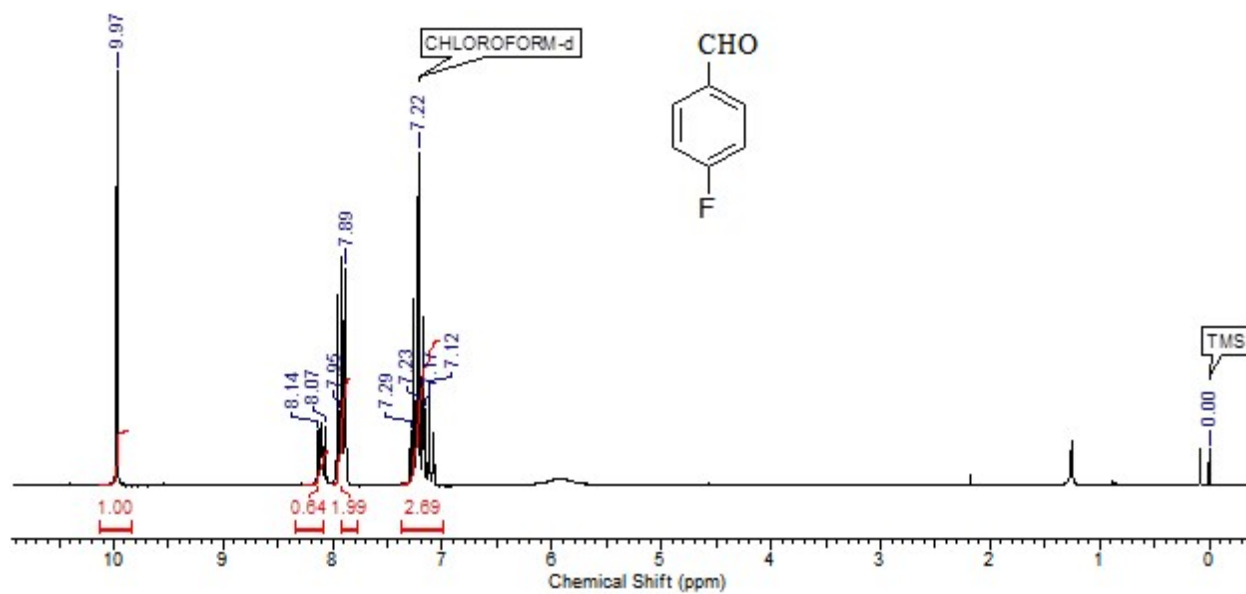

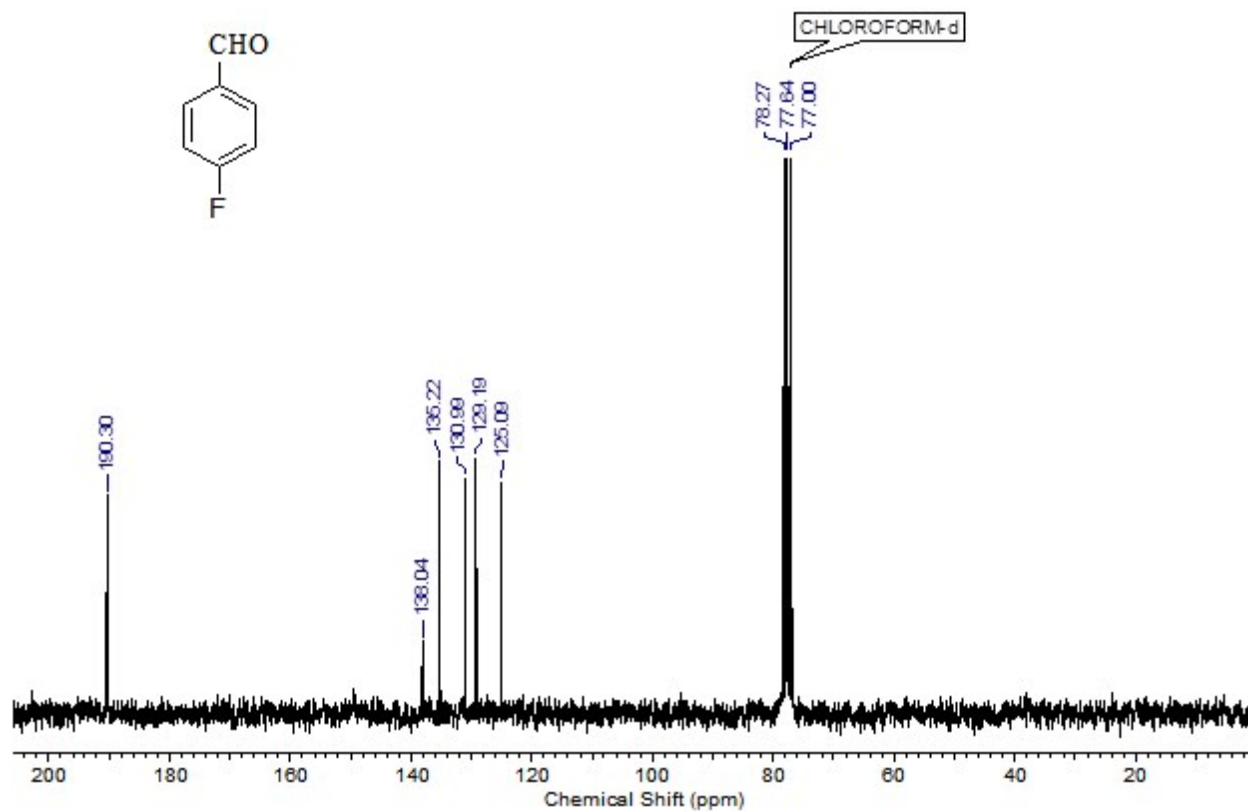

4d. 3-Chlorobenzaldehyde

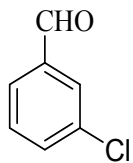

Mol. Wt.: 140.57

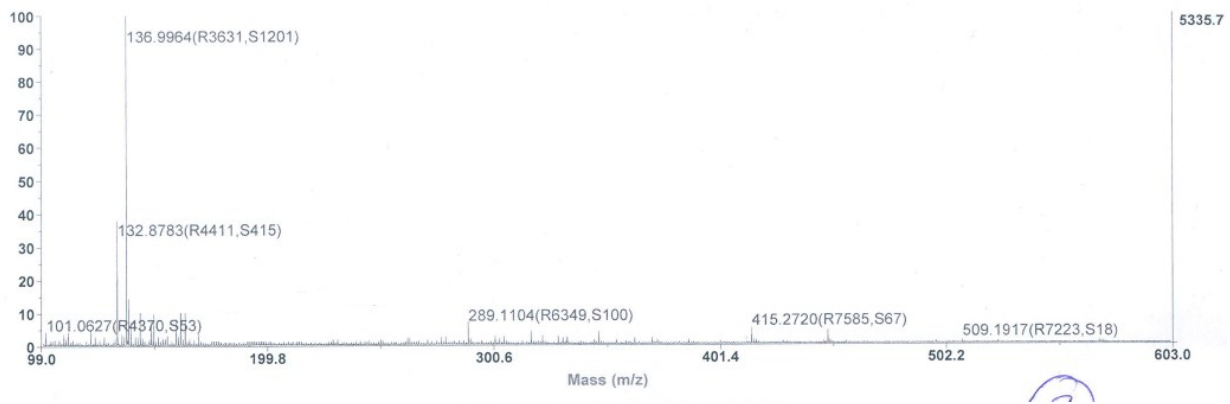

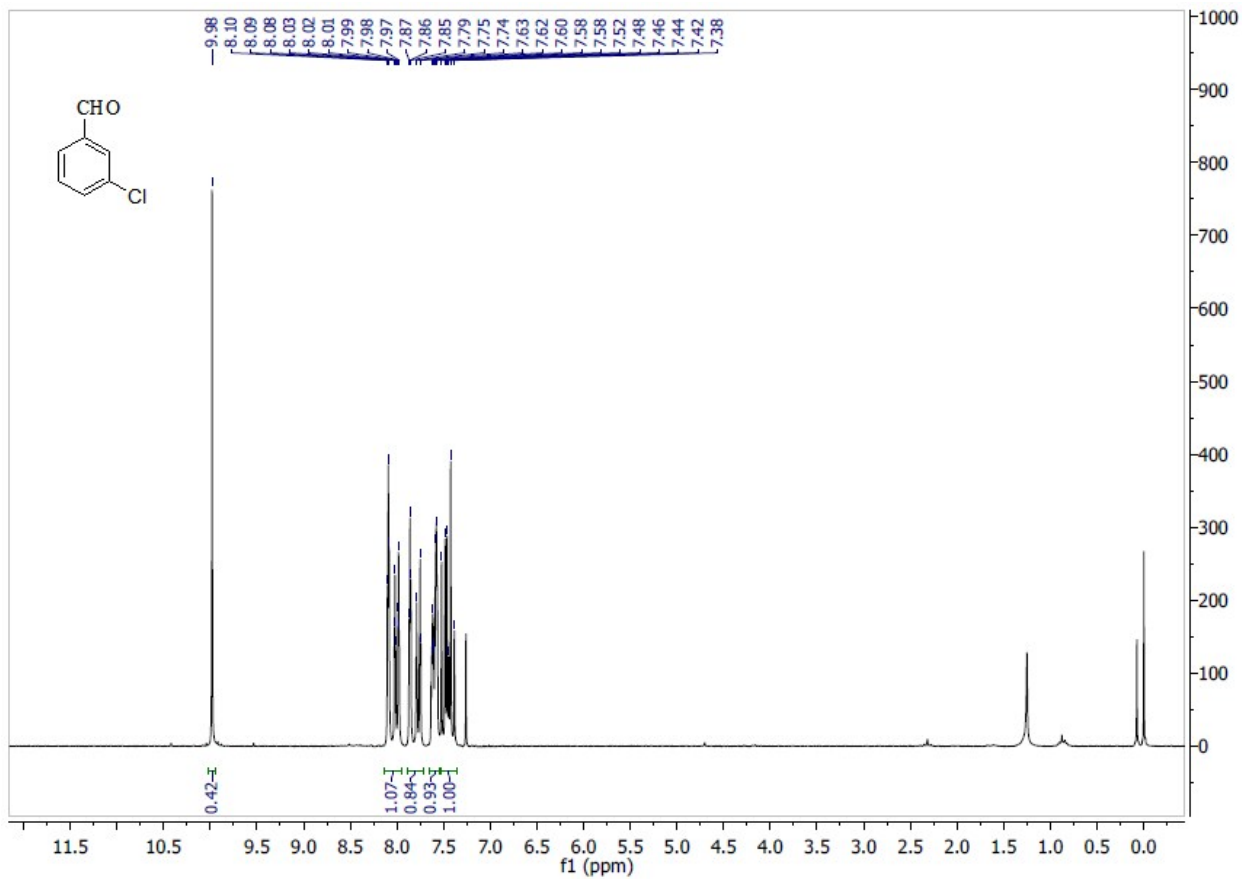

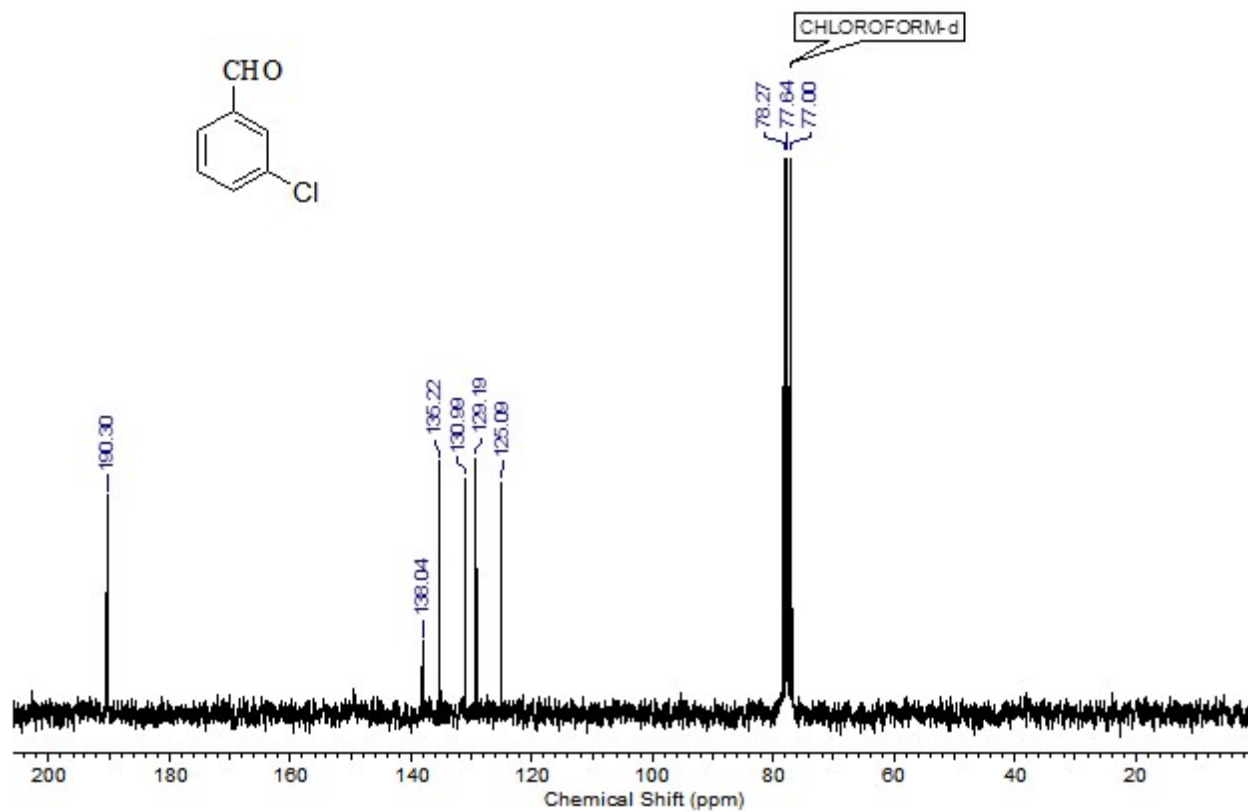



6f. 4-Methoxybenzaldehyde

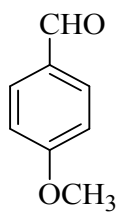

Mol. Wt.: 136.15

Line#:1 R.Time:3.915(Scan#:384)

MassPeaks:461

RawMode:Averaged 3.600-3.990(321-399) BasePeak:135(920025)

BG Mode:None Group 1 - Event 1

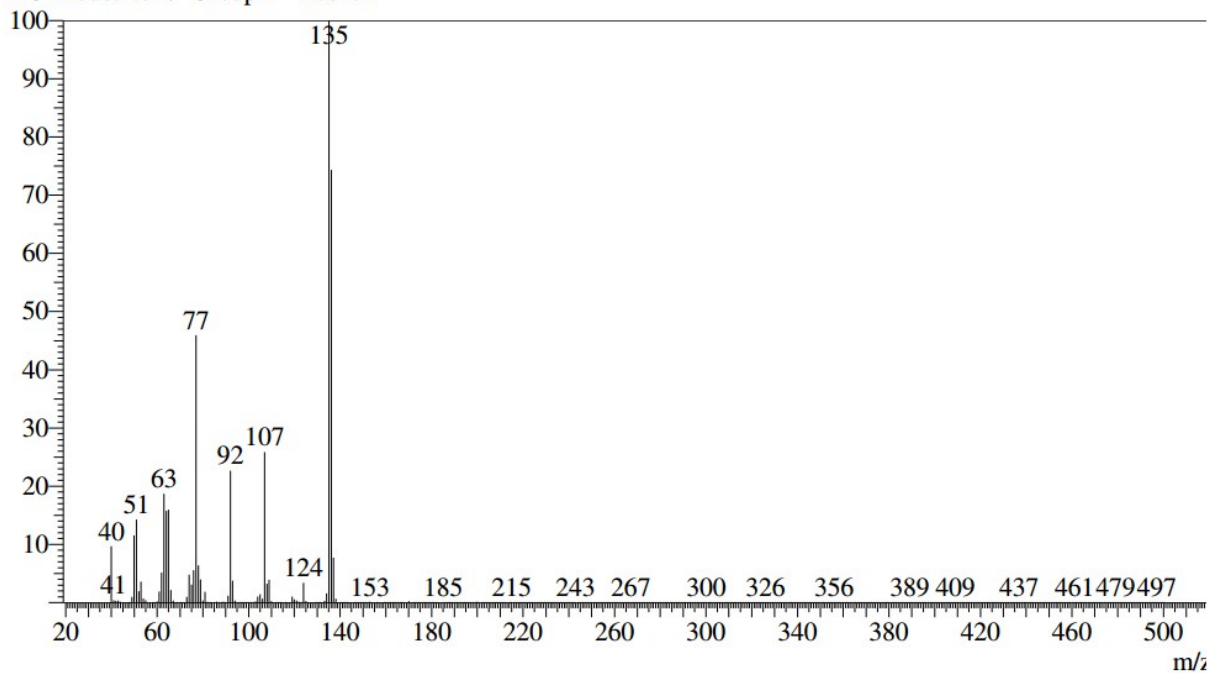

181214-18-DC-MGP-3

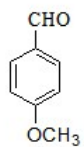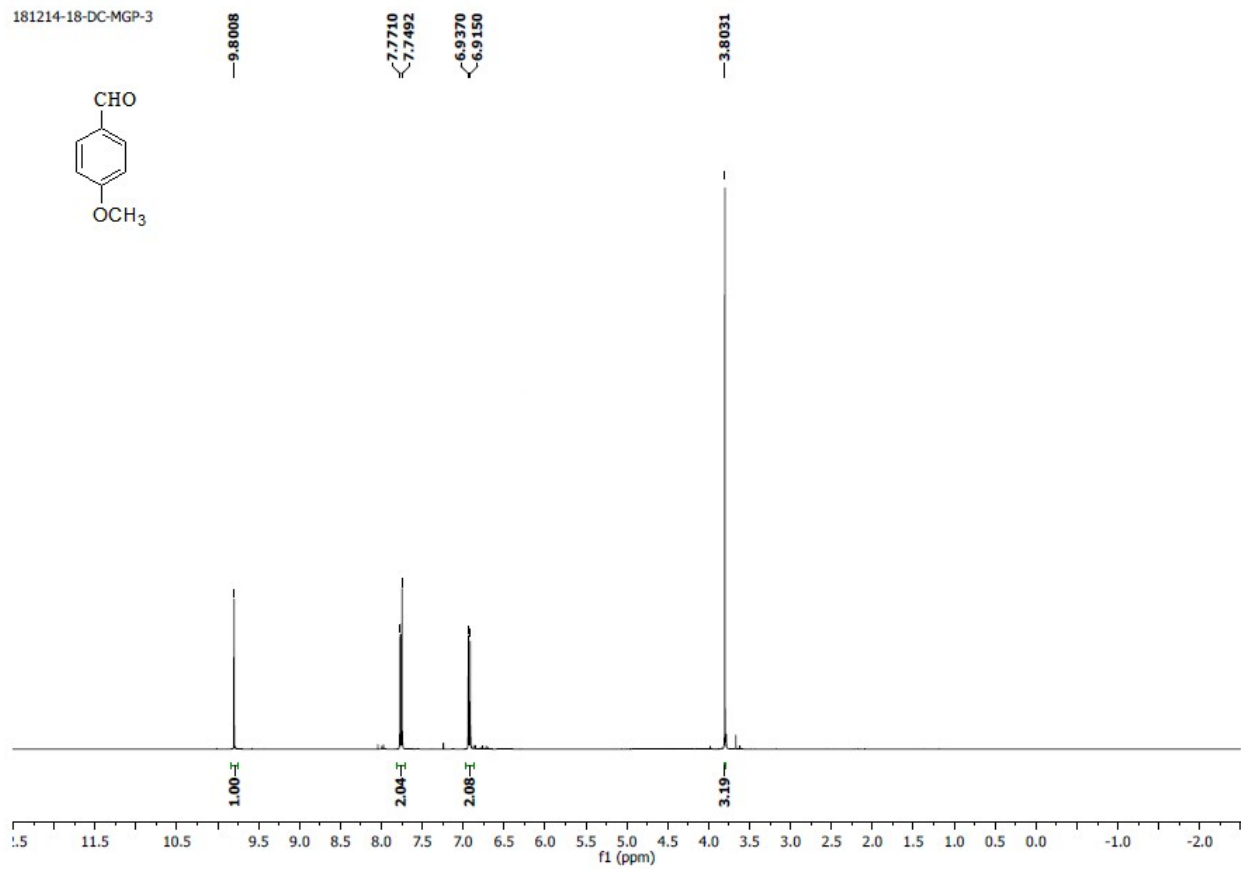

181214-18-DC-MGP-3

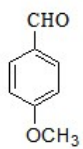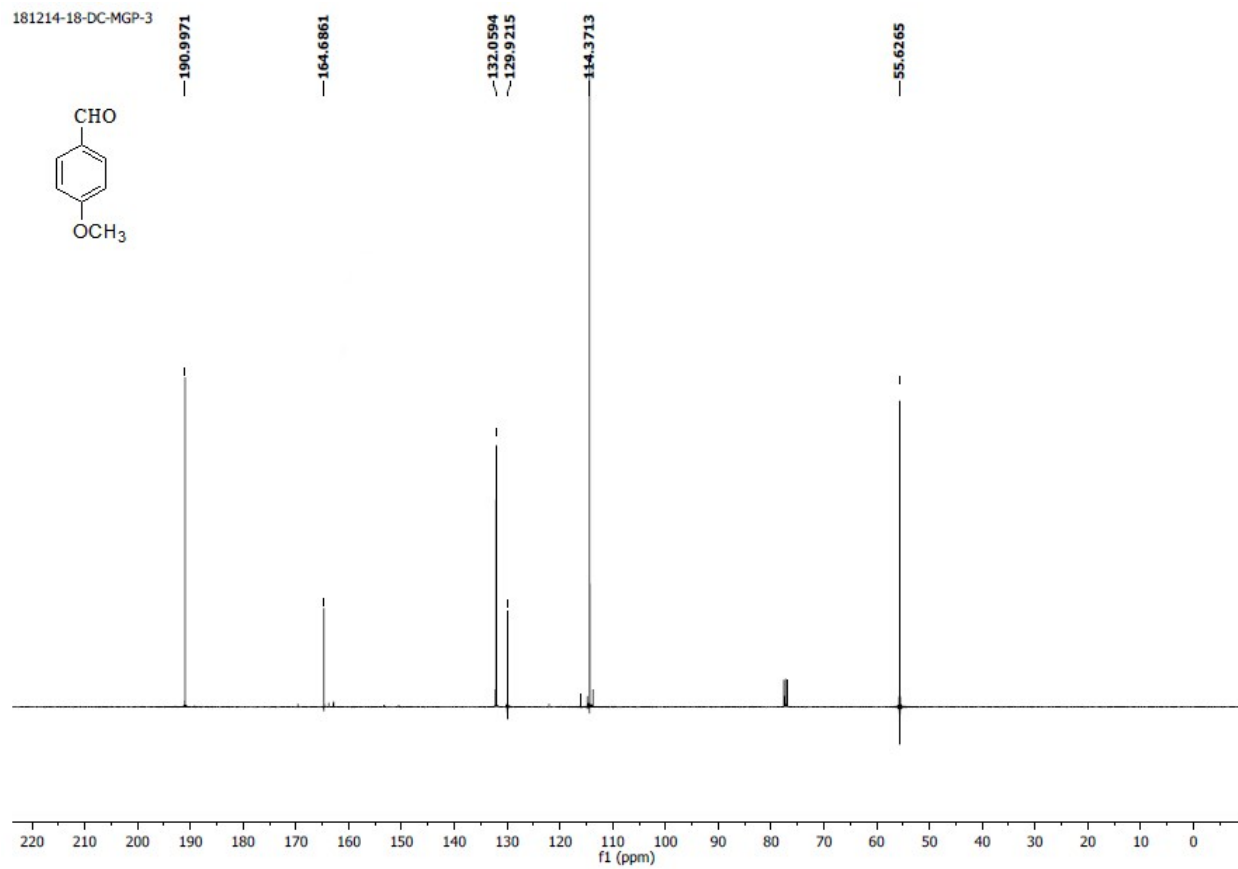

7g. 4-Hydroxybenzaldehyde

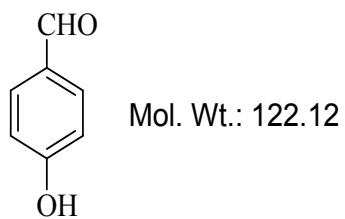

Line#:1 R.Time:5.095(Scan#:620)

MassPeaks:243

RawMode:Averaged 5.090-5.100(619-621) BasePeak:121(156167)

BG Mode:Averaged 5.820-5.830(765-767) Group 1 - Event 1

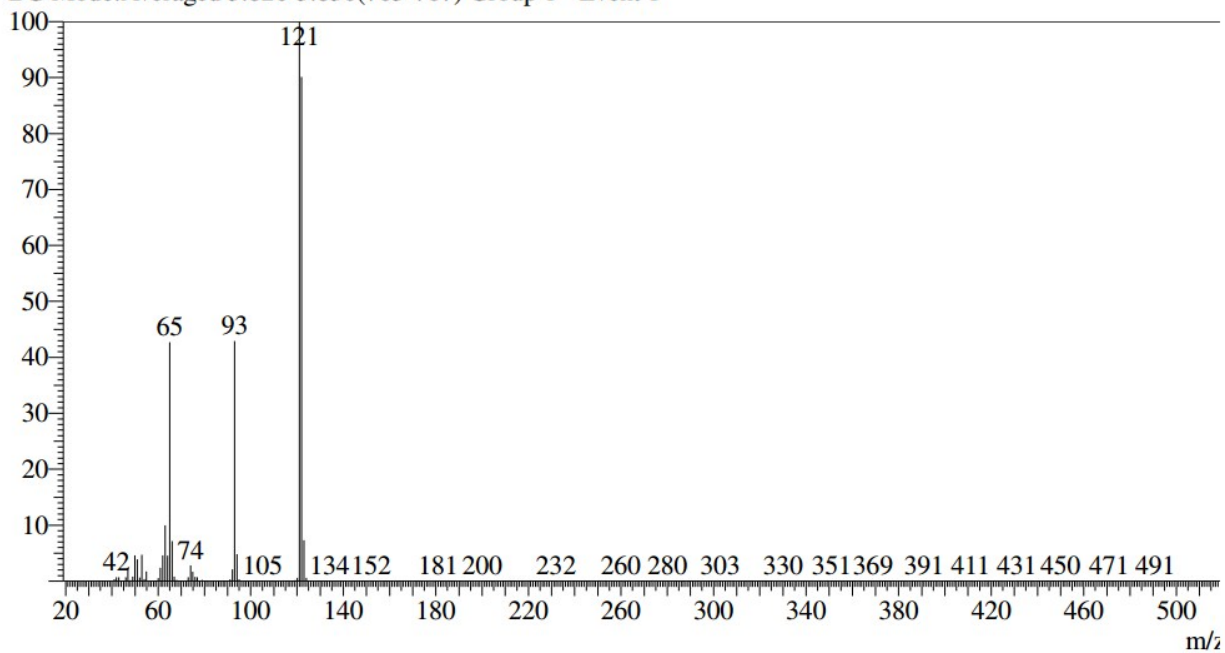

181214-16-DC-MGP-1

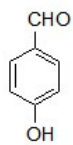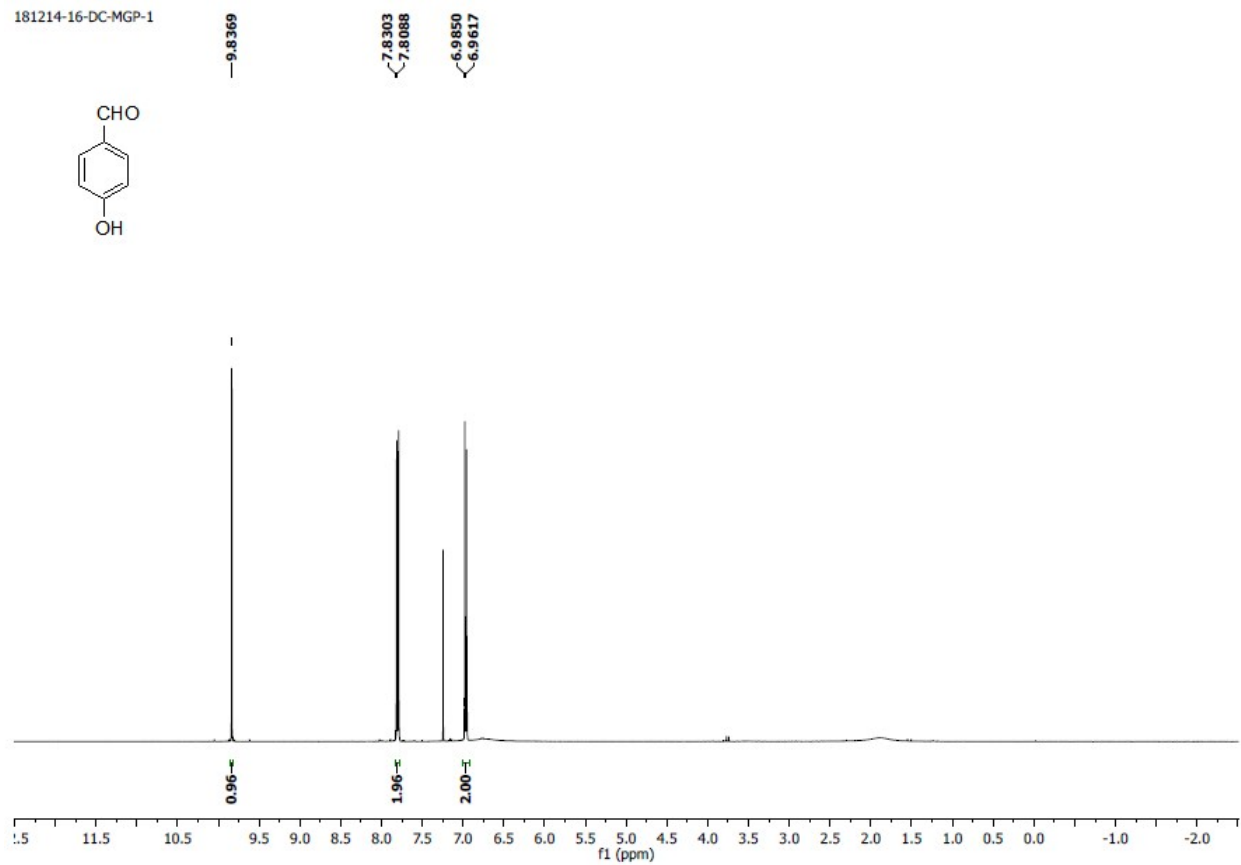

181214-16-DC-MGP-1

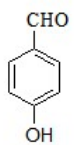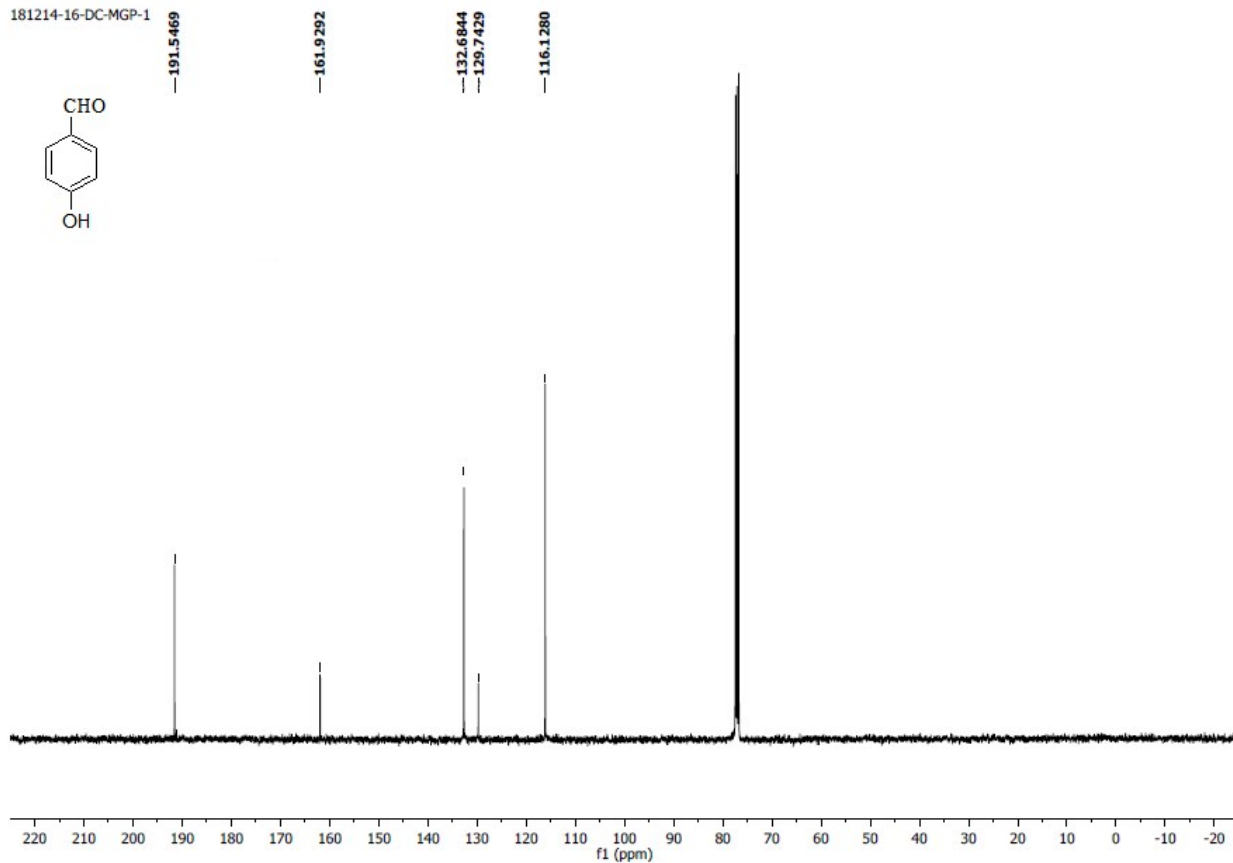

8h. 2-Hydroxybenzaldehyde

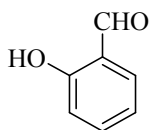

Mol. Wt.: 122.12

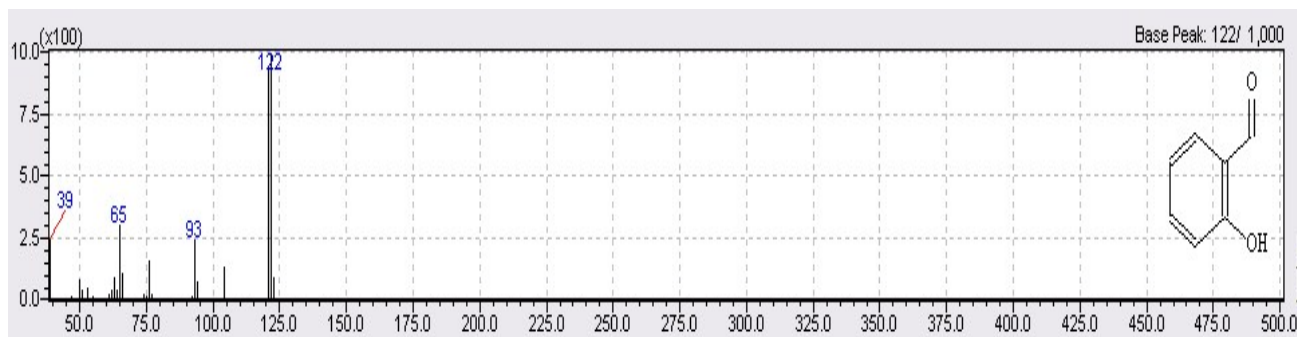

181214-17-DC-MGP-2

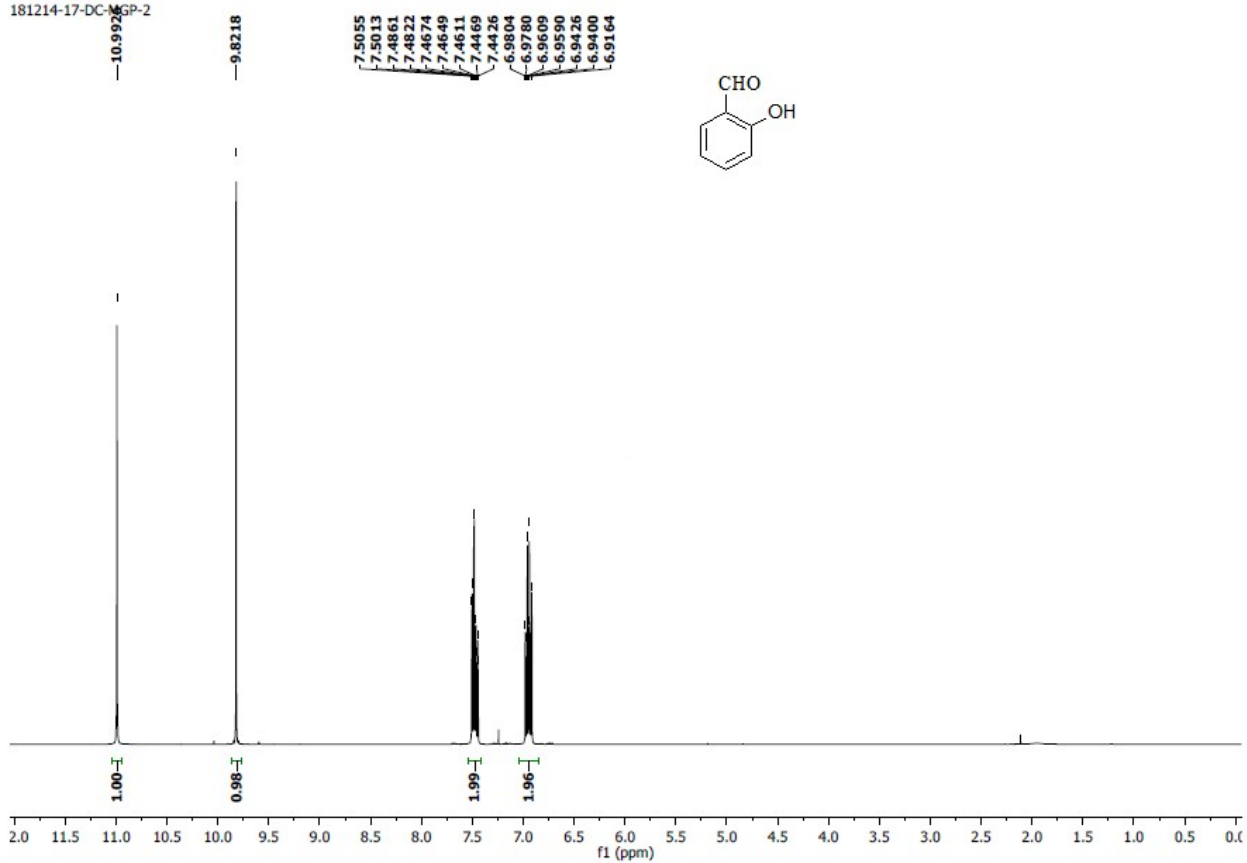

181214-17-DC-M06-2

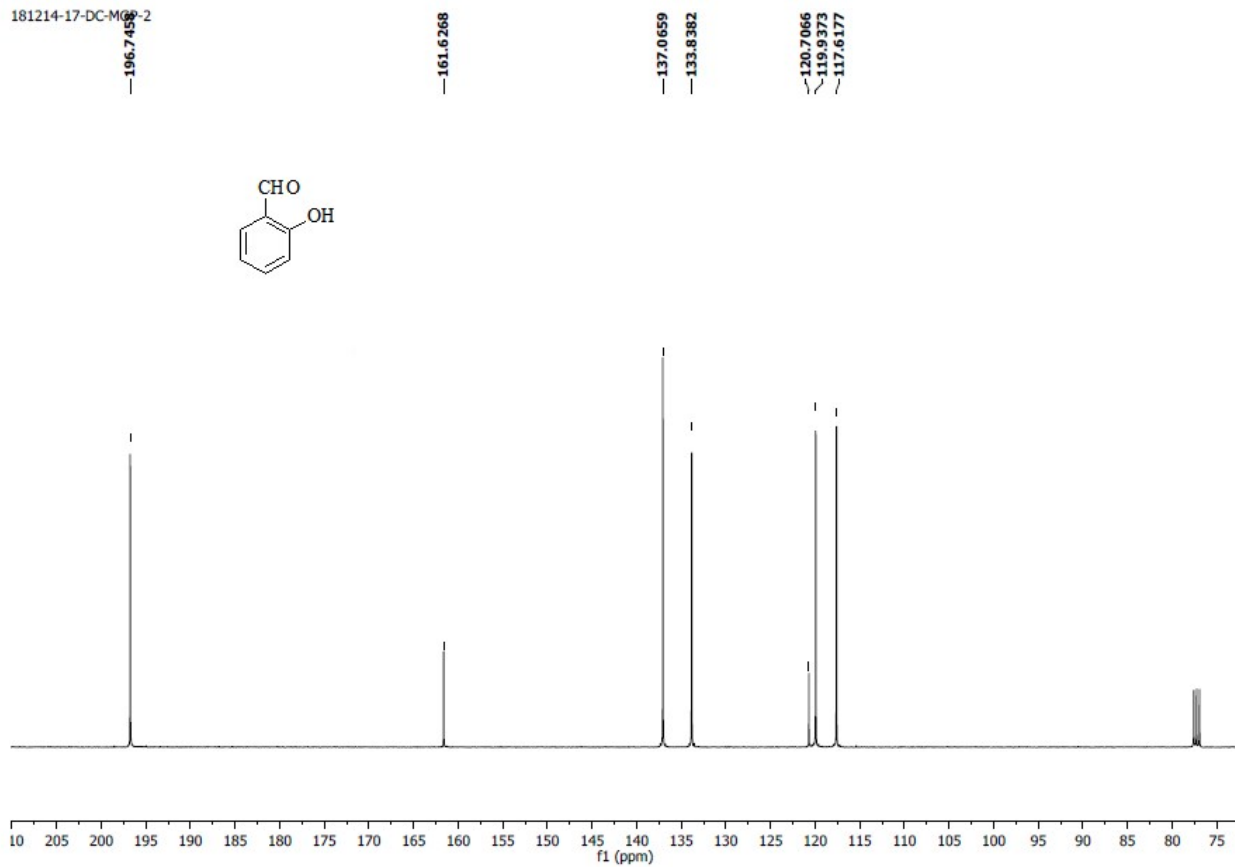



#### **S4. References:**

- [1] P. Das, N. Aggarwal, N.R. Guha, *Tetrahedron Lett.* 54 (2013) 2924.
